# Supplementary material for: Reconstruction and immobilization of polymolybdate induced by metal–organic coordination units for enhanced electrocatalytic hydrogen generation
Source: Royal Society of Chemistry journal article supplement (doi:10.1039/d4qi02311k), 2024-01-01
Supplement: d4qi02311k1.pdf [file d4qi02311k1.pdf]

## Supporting Information

### Electronic Supporting Information

# Reconstruction and immobilization of polymolybdate induced by metal-organic coordination units for enhanced electrocatalytic hydrogen generation

Jingyi Ma, Zhihan Chang\*, Juju Liang, Yuchun Lin, Yaling Zhu and Xiuli Wang\*

*College of Chemistry and Materials Engineering, Professional Technology Innovation Center of Liaoning Province for Conversion Materials of Solar Cell, Bohai University, Jinzhou 121013, P. R. China*

*Corresponding authors, E-mail addresses: changzhihan1234@126.com; wangxiuli@bhu.edu.cn (X. L. Wang)*

### X-ray Crystallography

Crystallographic data for complexes **1-3** were collected on a Bruker SMART APEX II with Mo K $\alpha$  ( $\lambda = 0.71073$  Å) by  $\omega$  and  $\theta$  scan mode. All structures were solved by direct methods and refined on  $F^2$  by full-matrix least squares using the OLEX2 package. The command "ISOR" was used to refine atoms O42, in complex **4**. The command "SIUM" was used to refine atoms O42, in complex **4**. The command "DFIX" was used to refine atoms O49 O18.\$1 and H9A O17 in complex **4**. The command "SADI" was used to refine atoms Ni1 H4Wa Ni1 H4Wb and Ni1 H3Wa Ni1 H3Wb in complex **1** and O18 O18\_\$1 O49 O49\_\$1 O18 O18\_\$1 O43 O43\_\$1 in complex **4**. The command "SFAC" was used to refine atoms C H Mo N Ni O, in complex **1**, C H Mo N O Zn, in complex **2** and C H Al Cu Mo N O, in complex **3**. Crystallographic data for the structures reported in this paper have been deposited in the Cambridge Crystallographic Data Center with CCDC Numbers 2375586, 2381066, 2375622 and 2375589. Centre via [www.ccdc.cam.ac.uk/data\\_request/cif](http://www.ccdc.cam.ac.uk/data_request/cif).

## Materials and measurements

The ligand H<sub>2</sub>dpyh was prepared according to a literature method.<sup>1</sup> All other chemicals and carbon cloth are of commercial origin and used directly without further purification. The FT-IR spectra were performed on a Varian 640-IR spectrometer (KBr pellets). X-ray diffraction (XRD) patterns of powdered samples were performed using an Ultima IV with D/teX Ultra diffractometer at 40 kV, 40 mA with Cu K $\alpha$  radiation. The morphology of the samples were characterized by scanning electron microscopy (SEM, S-4800, HITACHI, Japan). The stability of the material was verified by testing the content of Mo contained in the solution after the testing using Inductively Coupled Plasma Optical Emission Spectrometer (ICPE-9820).

### Preparation of complexes 1-4

**Synthesis of Ni<sub>2</sub>(H<sub>2</sub>O)<sub>8</sub>(H<sub>2</sub>dpyh)(Mo<sub>8</sub>O<sub>26</sub>) (1)** A mixture of Ni(NO<sub>3</sub>)<sub>2</sub> · 6H<sub>2</sub>O (0.10 g, 0.34 mmol), H<sub>2</sub>dpyh (0.03 g, 0.0067 mmol), and (NH<sub>4</sub>)<sub>6</sub>Mo<sub>7</sub>O<sub>24</sub> · 4H<sub>2</sub>O (0.124 g, 0.01 mmol) was stirred in 8 ml demonized water and the pH value was adjusted to about 1.95 by 0.5 M HNO<sub>3</sub> solution. Then the suspension was transferred to a Teflon-lined autoclave (25 mL) and kept at 120 °C for 4 days. Green block crystals of **1** were obtained (Yield 42 % based on Mo) after cooling to room temperature.

**Zn<sub>2</sub>(H<sub>2</sub>O)<sub>2</sub>(H<sub>2</sub>dpyh)<sub>2</sub>( $\beta$ -Mo<sub>8</sub>O<sub>26</sub>) (2)** A mixture of Zn(NO<sub>3</sub>)<sub>2</sub> · 6H<sub>2</sub>O (0.10 g, 0.34 mmol), H<sub>2</sub>dpyh (0.045 g, 0.01 mmol), and (NH<sub>4</sub>)<sub>6</sub>Mo<sub>7</sub>O<sub>24</sub> · 4H<sub>2</sub>O (0.124 g, 0.01 mmol) was stirred in 8 ml demonized water and the pH value was adjusted to about 1.92 by 0.5 M HNO<sub>3</sub> solution. Then the suspension was transferred to a Teflon-lined autoclave (25 mL) and kept at 120 °C for 4 days. Transparent block crystals of **1** were obtained (Yield 53 % based on Mo) after cooling to room temperature.

**{Cu<sub>8</sub>( $\mu_2$ -OH)<sub>2</sub>(dpyh)<sub>4</sub>[AlMo<sub>6</sub>(OH)<sub>7</sub>O<sub>17</sub>]<sub>3</sub> · 8H<sub>2</sub>O (3)** Complex **3** was obtained employing a similar procedure to that for **2**, except that Cu(NO<sub>3</sub>)<sub>2</sub> · 3H<sub>2</sub>O was used instead of Zn(NO<sub>3</sub>)<sub>2</sub> · 6H<sub>2</sub>O and (NH<sub>4</sub>)<sub>6</sub>Mo<sub>7</sub>O<sub>24</sub> · 4H<sub>2</sub>O was replaced by Na<sub>3</sub>[AlMo<sub>6</sub>(OH)<sub>6</sub>O<sub>18</sub>] · 8H<sub>2</sub>O. The pH value was adjusted to about 2.50. Blue block

crystals of **3** were obtained (Yield 55 % based on Mo) after cooling to room temperature.

**Cu<sub>4</sub>(H<sub>2</sub>O)<sub>6</sub>(dpyh)<sub>2</sub>(TeMo<sub>12</sub>O<sub>40</sub>) (2)** Complex **4** was obtained employing a similar procedure to that for **3**, except that Na<sub>3</sub>[AlMo<sub>6</sub>(OH)<sub>6</sub>O<sub>18</sub>]·8H<sub>2</sub>O was replaced by (NH<sub>4</sub>)<sub>6</sub>[TeMo<sub>6</sub>O<sub>24</sub>]·7H<sub>2</sub>O and the pH value was adjusted to about 2.23. Blue block crystals of **4** were obtained (Yield 38 % based on Mo) after cooling to room temperature.

### Electrochemical measurements

HER measurements at different electrolytes including alkaline (1 M KOH) and seawater (1 M KOH+0.5 M NaCl) media were carried out on an electrochemical station (CHI 760) with a three-electrode system. The mercury oxide electrode (in 1 M KOH and seawater) were used as reference electrodes. The platinum wire was used as counter electrode. **1-4/CC** (0.5 × 2 cm<sup>2</sup>) was directly used as the working electrode with the average loading mass of 4 mg cm<sup>-2</sup> for the grounded complex. The testing area was 1 cm<sup>2</sup>. Working potentials were converted with respect to reversible hydrogen electrode (RHE) according to the equation:  $E_{RHE} = E_{Hg/Hgo} + 0.098 + 0.059pH$ . The measurement area was 1 cm<sup>2</sup>.

**Table S1** Crystallographic data for complex **1-4**

| Complex             | <b>1</b>                                                                                       | <b>2</b>                                                                          | <b>3</b>                                                                                                         | <b>4</b>                                                                                            |
|---------------------|------------------------------------------------------------------------------------------------|-----------------------------------------------------------------------------------|------------------------------------------------------------------------------------------------------------------|-----------------------------------------------------------------------------------------------------|
| Empirical formula   | C <sub>14</sub> H <sub>34</sub> Mo <sub>8</sub> N <sub>6</sub> Ni <sub>2</sub> O <sub>36</sub> | C <sub>14</sub> H <sub>20</sub> Mo <sub>4</sub> N <sub>6</sub> O <sub>16</sub> Zn | C <sub>56</sub> H <sub>84</sub> Al <sub>3</sub> Cu <sub>8</sub> Mo <sub>18</sub> N <sub>24</sub> O <sub>90</sub> | C <sub>28</sub> H <sub>44</sub> Cu <sub>4</sub> Mo <sub>12</sub> N <sub>12</sub> O <sub>50</sub> Te |
| Formula weight      | 1747.41                                                                                        | 977.467                                                                           | 4849.65                                                                                                          | 2881.79                                                                                             |
| Crystal system      | monoclinic                                                                                     | monoclinic                                                                        | triclinic                                                                                                        | monoclinic                                                                                          |
| Space group         | P2/n                                                                                           | P2 <sub>1</sub> /c                                                                | P-1                                                                                                              | P2 <sub>1</sub> /n                                                                                  |
| a (Å)               | 15.7717(5)                                                                                     | 9.7256(4)                                                                         | 15.0730(4)                                                                                                       | 18.3184(10)                                                                                         |
| b (Å)               | 7.8616(2)                                                                                      | 16.1956(7)                                                                        | 15.3343(4)                                                                                                       | 22.4004(10)                                                                                         |
| c (Å)               | 19.9192(6)                                                                                     | 17.6443(7)                                                                        | 17.7621(4)                                                                                                       | 19.0322(10)                                                                                         |
| α (°)               | 90                                                                                             | 90                                                                                | 90.3450(10)                                                                                                      | 90                                                                                                  |
| β (°)               | 111.6410(10)                                                                                   | 103.292(2)                                                                        | 113.7870(10)                                                                                                     | 108.005(2)                                                                                          |
| γ (°)               | 90                                                                                             | 90                                                                                | 105.2450(10)                                                                                                     | 90                                                                                                  |
| V (Å <sup>3</sup> ) | 2295.71(12)                                                                                    | 2704.7(2)                                                                         | 3595.15(16)                                                                                                      | 7427.2(7)                                                                                           |
| Z                   | 2                                                                                              | 4                                                                                 | 1                                                                                                                | 4                                                                                                   |

|                              |        |        |        |        |
|------------------------------|--------|--------|--------|--------|
| $D_c$ (g/cm <sup>3</sup> )   | 2.528  | 2.400  | 2.240  | 2.577  |
| $M$ (mm <sup>-1</sup> )      | 3.015  | 2.761  | 2.788  | 3.559  |
| $F(000)$                     | 1680.0 | 1862.7 | 2335.0 | 5472.0 |
| Reflections collected        | 42475  | 96760  | 115469 | 125530 |
| Unique reflections           | 4543   | 4754   | 12614  | 12986  |
| $R_{int}$                    | 0.0577 | 0.1027 | 0.0632 | 0.0657 |
| GOF                          | 1.062  | 1.115  | 1.034  | 1.039  |
| $R_1^a$ [ $I > 2\sigma(I)$ ] | 0.0217 | 0.0319 | 0.0247 | 0.0348 |
| $wR_2^b$ (all data)          | 0.0531 | 0.0760 | 0.0630 | 0.0962 |

$$^a R_1 = \frac{\sum ||F_o| - |F_c||}{\sum |F_o|}; \quad ^b wR_2 = \frac{\sum [w(F_o^2 - F_c^2)^2]}{\sum [w(F_o^2)^2]}^{1/2}$$

**Table S2** Bond lengths [Å] and angles [°] for complex **1-4**

| Complex 1            |            |                         |            |
|----------------------|------------|-------------------------|------------|
| Ni1-O1               | 2.085(3)   | O4W-Ni1-O1W             | 176.01(13) |
| Ni1-O1W              | 2.041(3)   | O4W-Ni1-O2W             | 93.15(14)  |
| Ni1-O2W              | 2.052(3)   | O4W-Ni1-O3W             | 86.43(15)  |
| Ni1-O3W              | 2.037(3)   | O4W-Ni1-N1              | 88.33(13)  |
| Ni1-O4W              | 2.021(3)   | O3W-Ni1-O1              | 91.47(15)  |
| Ni1-N1               | 2.047(3)   | O3W-Ni1-O1W             | 89.85(15)  |
| O1W-Ni1-O1           | 85.21(12)  | O3W-Ni1-O2W             | 94.19(17)  |
| O1W-Ni1-O2W          | 88.53(13)  | O3W-Ni1-N1              | 168.77(17) |
| O1W-Ni1-N1           | 95.09(13)  | N1-Ni1-O1               | 78.93(11)  |
| O2W-Ni1-O1           | 171.55(13) | N1-Ni1-O2W              | 96.00(12)  |
| O4W-Ni1-O1           | 93.45(13)  |                         |            |
| Complex 2            |            |                         |            |
| Zn1-O2               | 2.104(4)   | O1-Zn1-O15 <sup>3</sup> | 103.41(17) |
| Zn1-O1W              | 2.129(4)   | N1-Zn1-O2               | 91.82(16)  |
| Zn1-O15 <sup>3</sup> | 2.122(4)   | N1-Zn1-O1W              | 96.85(17)  |

|                           |            |                                       |            |
|---------------------------|------------|---------------------------------------|------------|
| Zn1-O1                    | 2.180(4)   | N1-Zn1-O15 <sup>3</sup>               | 97.59(17)  |
| Zn1-N1                    | 2.069(5)   | N1-Zn1-O1                             | 76.85(17)  |
| Zn1-N5 <sup>3</sup>       | 2.068(5)   | N5 <sup>3</sup> -Zn1-O2               | 94.38(16)  |
| O1W-Zn1-O2                | 83.44(15)  | N5 <sup>3</sup> -Zn1-O1W              | 91.92(17)  |
| O15 <sup>3</sup> -Zn1-O2  | 166.63(16) | N5 <sup>3</sup> -Zn1-O15 <sup>3</sup> | 77.75(17)  |
| O15 <sup>3</sup> -Zn1-O1W | 86.02(17)  | N5 <sup>3</sup> -Zn1-O1               | 95.25(17)  |
| O1-Zn1-O2                 | 87.92(15)  | N5 <sup>3</sup> -Zn1-N1               | 169.79(18) |
| O1-Zn1-O1W                | 169.17(16) |                                       |            |
| <b>Complex 3</b>          |            |                                       |            |
| Cu4-O5                    | 1.999(2)   | N8-Cu3-O6                             | 165.41(10) |
| Cu4-O4W                   | 1.953(2)   | N8-Cu3-O4                             | 83.00(10)  |
| Cu4-N5                    | 1.939(3)   | N7-Cu3-O6                             | 95.66(10)  |
| Cu4-N6                    | 1.968(3)   | N7-Cu3-O4                             | 174.07(11) |
| Cu3-O6                    | 1.964(2)   | N7-Cu3-N8                             | 98.63(11)  |
| Cu3-O4                    | 1.941(2)   | O2-Cu1-O1                             | 100.20(9)  |
| Cu3-N8                    | 1.933(3)   | O1W-Cu1-O1                            | 96.64(10)  |
| Cu3-N7                    | 1.921(3)   | O1W-Cu1-O2                            | 84.71(11)  |
| Cu1-O1                    | 2.323(2)   | O1W-Cu1-N1                            | 164.03(12) |
| Cu1-O2                    | 1.997(2)   | N1-Cu1-O1                             | 93.26(10)  |
| Cu1-O1W                   | 1.947(3)   | N1-Cu1-O2                             | 81.21(11)  |
| Cu1-N1                    | 1.962(3)   | N2-Cu1-O1                             | 92.83(11)  |
| Cu1-N2                    | 1.943(3)   | N2-Cu1-O2                             | 166.96(12) |
| Cu2-O3                    | 2.018(3)   | N2-Cu1-O1W                            | 93.39(13)  |
| Cu2-O3W                   | 2.326(3)   | N2-Cu1-N1                             | 98.63(12)  |
| Cu2-O2W                   | 1.957(3)   | O3-Cu2-O3W                            | 107.24(11) |
| Cu2-N3                    | 1.959(3)   | O2W-Cu2-O3                            | 85.11(12)  |
| Cu2-N4                    | 1.952(3)   | O2W-Cu2-O3W                           | 93.37(13)  |
| O4W-Cu4-O5                | 87.24(10)  | O2W-Cu2-N3                            | 94.62(12)  |
| O4W-Cu4-N6                | 167.80(10) | N3-Cu2-O3                             | 161.34(12) |

|                  |            |             |            |
|------------------|------------|-------------|------------|
| N5-Cu4-O5        | 170.33(11) | N3-Cu2-O3W  | 91.40(11)  |
| N5-Cu4-O4W       | 94.28(10)  | N4-Cu2-O3   | 81.07(12)  |
| N5-Cu4-N6        | 97.59(11)  | N4-Cu2-O3W  | 90.34(11)  |
| N6-Cu4-O5        | 81.53(10)  | N4-Cu2-O2W  | 166.17(12) |
| O4-Cu3-O6        | 83.08(9)   | N4-Cu2-N3   | 98.60(12)  |
| <b>Complex 4</b> |            |             |            |
| Cu2-O2           | 1.977(4)   | N8-Cu4-O4   | 81.67(17)  |
| Cu2-O2W          | 1.969(4)   | N8-Cu4-O6W  | 169.10(19) |
| Cu2-N4           | 1.937(5)   | N8-Cu4-O5W  | 90.5(2)    |
| Cu2-N3           | 1.954(5)   | O6W-Cu4-O4  | 87.58(18)  |
| Cu4-O4           | 1.991(4)   | O6W-Cu4-O5W | 93.5(2)    |
| Cu4-N8           | 1.950(5)   | N6-Cu4-O4   | 162.9(2)   |
| Cu4-O6W          | 1.967(4)   | N6-Cu4-N8   | 97.53(19)  |
| Cu4-N6           | 1.934(5)   | N6-Cu4-O6W  | 92.21(19)  |
| Cu4-O5W          | 2.359(6)   | N6-Cu4-O5W  | 95.3(3)    |
| Cu3-O3           | 2.021(4)   | O3-Cu3-O3W  | 95.6(2)    |
| Cu3-O4W          | 1.949(4)   | O4W-Cu3-O3  | 88.60(18)  |
| Cu3-N5           | 1.943(5)   | O4W-Cu3-O3W | 92.9(3)    |
| Cu3-N7           | 1.946(5)   | N5-Cu3-O3   | 81.28(17)  |
| Cu3-O3W          | 2.320(6)   | N5-Cu3-O4W  | 169.8(2)   |
| Cu1-O1           | 1.987(4)   | N5-Cu3-N7   | 97.28(19)  |
| Cu1-N1           | 1.940(5)   | N5-Cu3-O3W  | 87.5(2)    |
| Cu1-N2           | 1.930(5)   | N7-Cu3-O3   | 160.7(2)   |
| Cu1-O1W          | 1.941(4)   | N7-Cu3-O4W  | 92.5(2)    |
| O2W-Cu2-O2       | 88.95(17)  | N7-Cu3-O3W  | 103.6(2)   |
| N4-Cu2-O2        | 161.00(19) | N1-Cu1-O1   | 81.63(17)  |
| N4-Cu2-O2W       | 92.31(18)  | N1-Cu1-O1W  | 166.1(2)   |
| N4-Cu2-N3        | 98.28(19)  | N2-Cu1-O1   | 162.3(2)   |
| N3-Cu2-O2        | 81.93(17)  | N2-Cu1-N1   | 98.96(19)  |

|            |            |            |           |
|------------|------------|------------|-----------|
| N3-Cu2-O2W | 169.07(19) | N2-Cu1-O1W | 94.7(2)   |
| O4-Cu4-O5W | 101.7(2)   | O1W-Cu1-O1 | 86.30(18) |

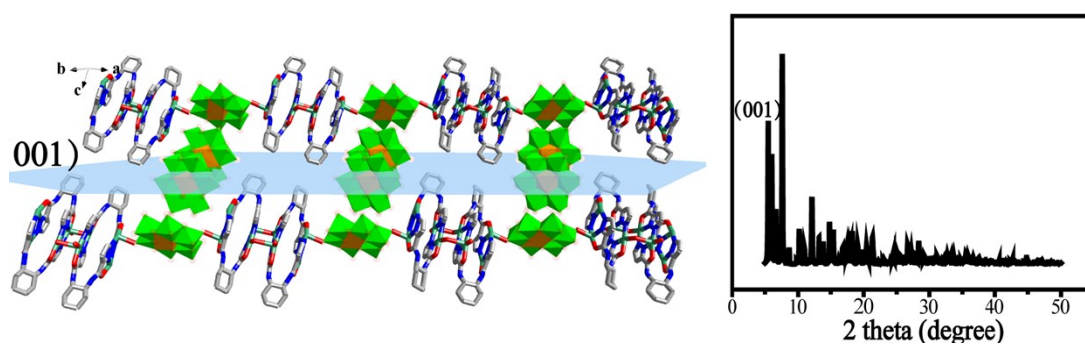

Fig. S1 The 1D inorganic chain and XRD data in **3**.

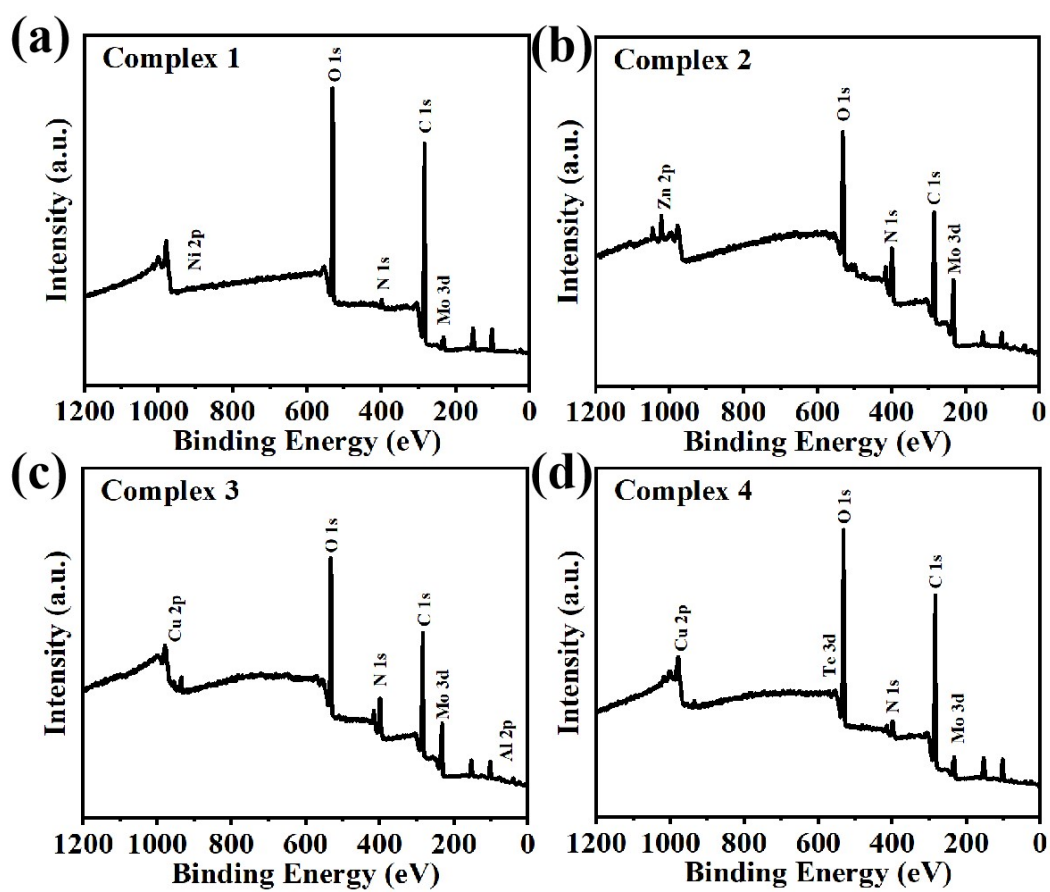

Fig. S2 X-ray photoelectron spectra (XPS) of complex 1-4

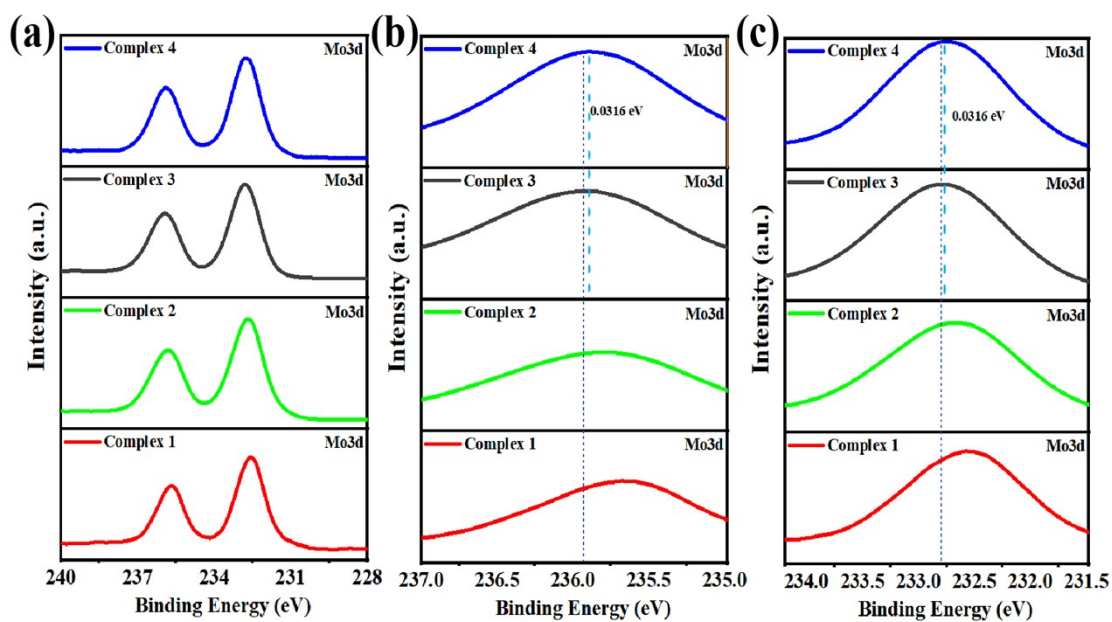

Fig. S3 The Mo3d XPS spectra of complex 1-4

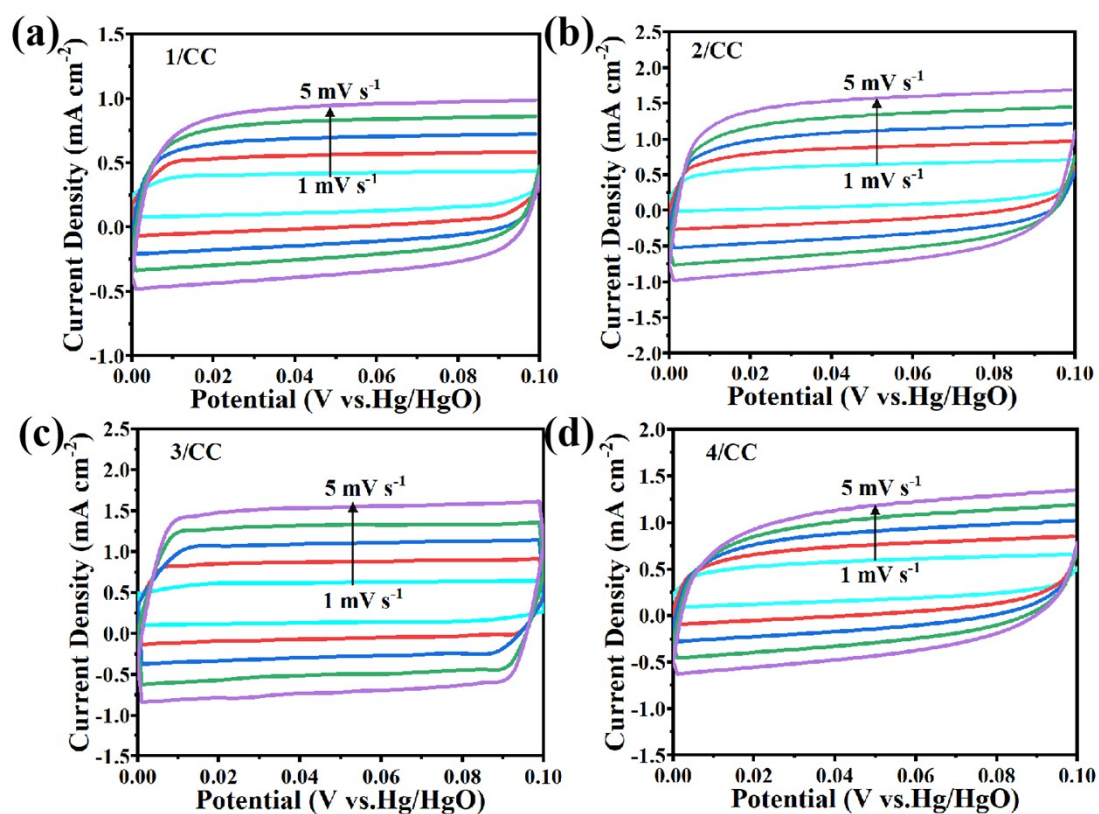

Fig. S4 CV curves for 1-4/CC at different rates from 1 mV/s to 5 mV/s in the region of 0~0.1 V in 1.0 mol/L KOH.



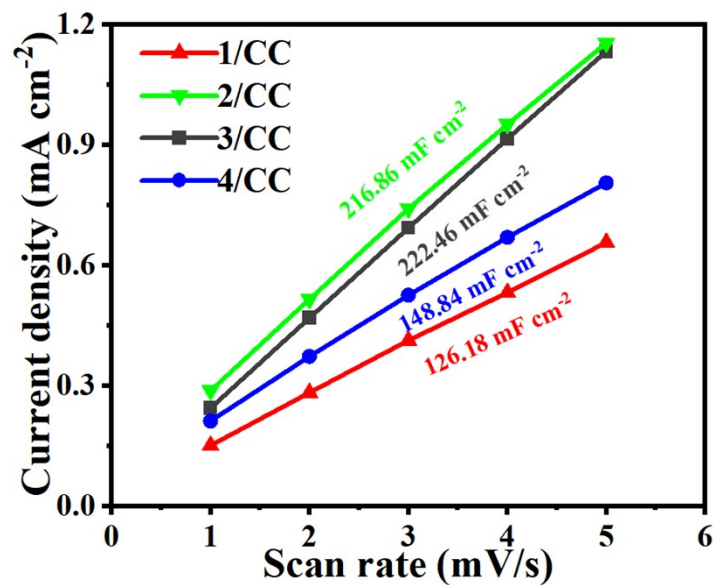

Fig. S5 Plots showing the extraction of the  $C_{dl}$  for 1-4/CC.

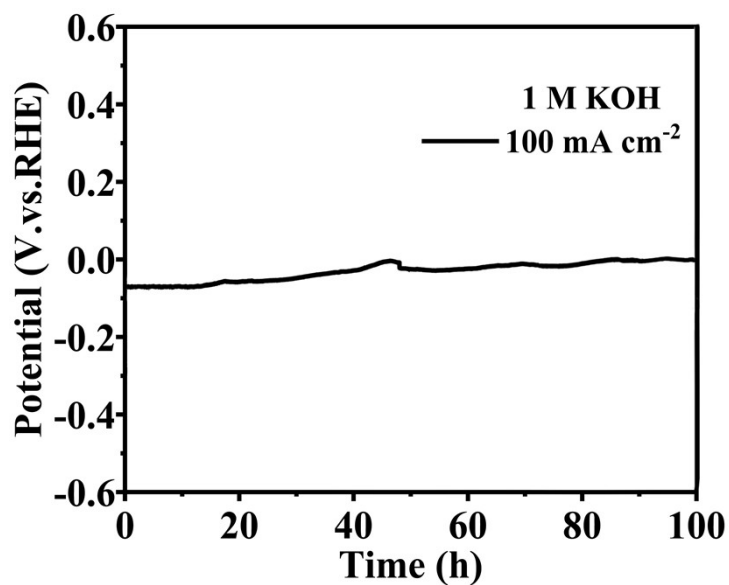

Fig. S6 Constant current test of 3/CC in 1M KOH at the current densities of 100 mA  $\text{cm}^{-2}$  for 100 h.

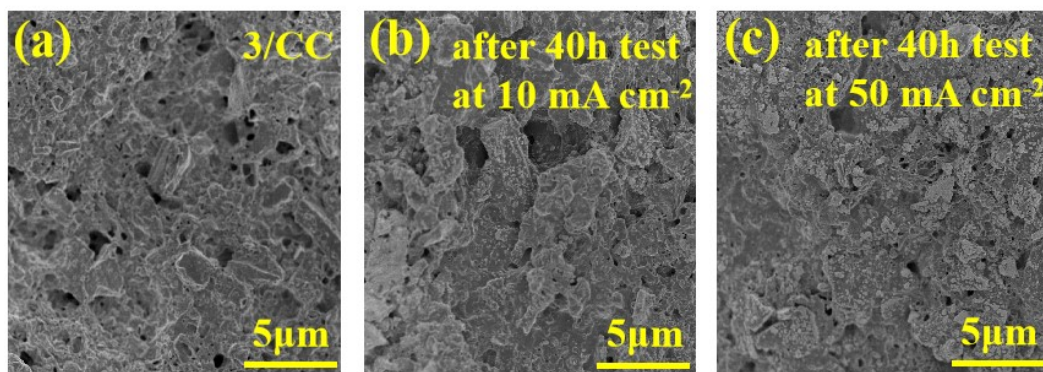

Fig. S7 (a) The SEM images of 3/CC ; the SEM images of 3/CC after long-term

stability test for 40 h in simulated seawater at (b) 10 mA cm<sup>-2</sup> and (c) 50 mA cm<sup>-2</sup>.

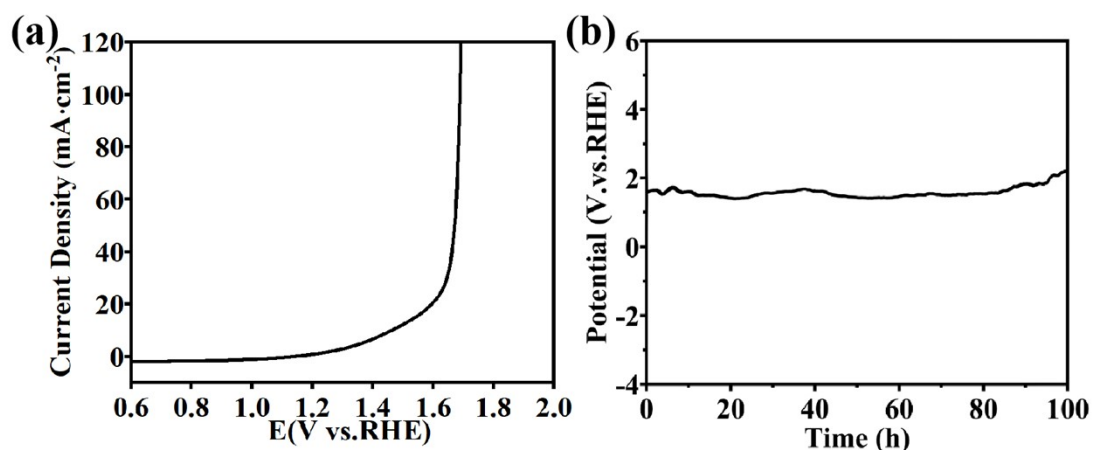

**Fig. S8** (a) LSV curves of 3/CC || RuO<sub>2</sub> and LSV curves after fully electrolyzed water experiment in simulated seawater; (b) Fully electrolyzed water experiment of 3/CC || RuO<sub>2</sub> in simulated seawater at 100 mA cm<sup>-2</sup> for 100 h.

**Table. S3** ICP-MS analysis results of the electrolyte before and after stability test

| Sample                                           | The amount of Mo in solution mg/L) |
|--------------------------------------------------|------------------------------------|
| Solution of KOH                                  | -0.00356                           |
| KOH solution after stability test                | 2.400                              |
| Simulated seawater solution before test          | -0.0286                            |
| Simulated seawater solution after stability test | 3.680                              |
